# Supplementary material for: Investigation of cattle plasma proteome in response to pain and inflammation using next generation proteomics technique, SWATH-MS
Source: Royal Society of Chemistry journal article supplement (doi:10.1039/d1mo00354b), 2021-12-03
Supplement: d1mo00354b2.pdf [file d1mo00354b2.pdf]

**Supplementary table 1: List of iRT peptides from Biognosys**

| List of iRT peptides in elution order: 1 | LGGNEQVTR      |
|------------------------------------------|----------------|
| 2                                        | GAGSSEPVTGLDAK |
| 3                                        | VEATFGVDESNK   |
| 4                                        | YILAGVENSK     |
| 5                                        | TPVISGGPYEYR   |
| 6                                        | TPVITGAPYEYR   |
| 7                                        | DGLDAASYAPVR   |
| 8                                        | ADVTPADFSEWSK  |
| 9                                        | GTFIIDPGGVIR   |
| 10                                       | GTFIIDPAAVIR   |
| 11                                       | LFLQFGAQGSPFLK |

**Supplementary table 2: List of bovine plasma proteins in spectral library.**

|    |              |                                                                                                        |
|----|--------------|--------------------------------------------------------------------------------------------------------|
| 1  | gi 157743038 | A2M protein [Bos taurus]                                                                               |
| 2  | gi 73587039  | Actin, alpha, cardiac muscle 1 [Bos taurus]                                                            |
| 3  | gi 555987199 | actin, cytoplasmic 2 isoform X1 [Bos mutus]                                                            |
| 4  | gi 942083545 | actin, cytoplasmic 2 isoform X2 [Bos mutus]                                                            |
| 5  | gi 982910899 | adiponectin isoform X2 [Bos taurus]                                                                    |
| 6  | gi 982928613 | afamin isoform X1 [Bos taurus]                                                                         |
| 7  | gi 982928616 | afamin isoform X2 [Bos taurus]                                                                         |
| 8  | gi 154425704 | ALB protein [Bos taurus]                                                                               |
| 9  | gi 74267962  | ALB protein [Bos taurus]                                                                               |
| 10 | gi 229552    | albumin                                                                                                |
| 11 | gi 162648    | albumin [Bos taurus]                                                                                   |
| 12 | gi 74268094  | Alpha-1 acid glycoprotein [Bos taurus]                                                                 |
| 13 | gi 555978416 | alpha-1-acid glycoprotein 1 [Bos mutus]                                                                |
| 14 | gi 86823979  | Alpha-1-B glycoprotein [Bos taurus]                                                                    |
| 15 | gi 741962304 | alpha-2-antiplasmin isoform X1 [Bos taurus]                                                            |
| 16 | gi 154426172 | Alpha-2-HS-glycoprotein [Bos taurus]                                                                   |
| 17 | gi 555998216 | alpha-2-HS-glycoprotein isoform X1 [Bos mutus]                                                         |
| 18 | gi 942100315 | alpha-2-HS-glycoprotein isoform X2 [Bos mutus]                                                         |
| 19 | gi 942061714 | alpha-2-macroglobulin isoform X1 [Bos mutus]                                                           |
| 20 | gi 528950741 | alpha-2-macroglobulin isoform X1 [Bos taurus]                                                          |
| 21 | gi 982982356 | alpha-2-macroglobulin isoform X2 [Bos taurus]                                                          |
| 22 | gi 408689603 | alpha-2-macroglobulin variant 20 [Bos taurus]                                                          |
| 23 | gi 408689609 | alpha-2-macroglobulin variant 23 [Bos taurus]                                                          |
| 24 | gi 440903847 | Alpha-2-macroglobulin, partial [Bos mutus]                                                             |
| 25 | gi 942061734 | alpha-2-macroglobulin-like [Bos mutus]                                                                 |
| 26 | gi 87196501  | alpha-enolase [Bos taurus]                                                                             |
| 27 | gi 74354219  | AMBP protein [Bos taurus]                                                                              |
| 28 | gi 75773673  | Amylase, alpha 2A (pancreatic) [Bos taurus]                                                            |
| 29 | gi 74354323  | Angiotensinogen (serpin peptidase inhibitor, clade A, member 8) [Bos taurus]                           |
| 30 | gi 555989638 | angiotensinogen [Bos mutus]                                                                            |
| 31 | gi 508830    | anti-idiotypic Ig heavy chain V region, partial [Bos taurus]                                           |
| 32 | gi 508840    | anti-idiotypic Ig lambda chain V region, partial [Bos taurus]                                          |
| 33 | gi 508834    | anti-respiratory syncytial virus Ig heavy chain V region, partial [Bos taurus]                         |
| 34 | gi 508836    | anti-respiratory syncytial virus Ig lambda chain V region, partial [Bos taurus]                        |
| 35 | gi 432627    | anti-testosterone antibody [Bos taurus]                                                                |
| 36 | gi 440       | anti-testosterone antibody [Bos taurus]                                                                |
| 37 | gi 555957525 | antithrombin-III [Bos mutus]                                                                           |
| 38 | gi 77736341  | antithrombin-III precursor [Bos taurus]                                                                |
| 39 | gi 74268269  | Apolipoprotein A-I [Bos taurus]                                                                        |
| 40 | gi 162678    | apolipoprotein A-I precursor [Bos taurus]                                                              |
| 41 | gi 245563    | apolipoprotein A-I, apoA-1 [Bos=cattle, Friesian-Holstein male calves aged 2-4 weeks, Peptide, 247 aa] |
| 42 | gi 440905769 | Apolipoprotein A-I, partial [Bos mutus]                                                                |
| 43 | gi 555995048 | apolipoprotein A-II [Bos mutus]                                                                        |
| 44 | gi 296489849 | apolipoprotein A-II precursor [Bos taurus]                                                             |

|    |              |                                                                                 |
|----|--------------|---------------------------------------------------------------------------------|
| 45 | gi 942055563 | apolipoprotein A-IV [Bos mutus]                                                 |
| 46 | gi 741951254 | apolipoprotein A-IV isoform X1 [Bos taurus]                                     |
| 47 | gi 555967548 | apolipoprotein B-100 [Bos mutus]                                                |
| 48 | gi 982991065 | apolipoprotein B-100 isoform X3 [Bos taurus]                                    |
| 49 | gi 156139070 | apolipoprotein C-II precursor [Bos taurus]                                      |
| 50 | gi 942055567 | apolipoprotein C-III [Bos mutus]                                                |
| 51 | gi 942055573 | apolipoprotein C-III isoform X2 [Bos mutus]                                     |
| 52 | gi 296480249 | apolipoprotein C-III precursor [Bos taurus]                                     |
| 53 | gi 741960139 | apolipoprotein C-IV isoform X1 [Bos taurus]                                     |
| 54 | gi 555971779 | apolipoprotein D [Bos mutus]                                                    |
| 55 | gi 81674721  | Apolipoprotein D [Bos taurus]                                                   |
| 56 | gi 942068223 | apolipoprotein E isoform X3 [Bos mutus]                                         |
| 57 | gi 942068236 | apolipoprotein E isoform X4 [Bos mutus]                                         |
| 58 | gi 982925893 | apolipoprotein F isoform X2 [Bos taurus]                                        |
| 59 | gi 109939993 | Apolipoprotein H (beta-2-glycoprotein I) [Bos taurus]                           |
| 60 | gi 440898772 | Apolipoprotein M [Bos mutus]                                                    |
| 61 | gi 942043113 | apolipoprotein R-like [Bos mutus]                                               |
| 62 | gi 73587088  | APOM protein [Bos taurus]                                                       |
| 63 | gi 86438511  | ApoN protein [Bos taurus]                                                       |
| 64 | gi 240977    | beta 2 glycoprotein I [cattle, Peptide, 326 aa]                                 |
| 65 | gi 555974800 | beta-2-glycoprotein 1 [Bos mutus]                                               |
| 66 | gi 982959007 | beta-2-glycoprotein 1 isoform X2 [Bos taurus]                                   |
| 67 | gi 27806741  | beta-2-glycoprotein 1 precursor [Bos taurus]                                    |
| 68 | gi 6         | beta-2-glycoprotein I, partial [Bos taurus]                                     |
| 69 | gi 942102570 | beta-2-microglobulin isoform X2 [Bos mutus]                                     |
| 70 | gi 528938459 | biotinidase isoform X1 [Bos taurus]                                             |
| 71 | gi 942088368 | BOLA class I histocompatibility antigen, alpha chain BL3-7, partial [Bos mutus] |
| 72 | gi 555992202 | butyrophilin-like protein 9 [Bos mutus]                                         |
| 73 | gi 92097580  | C1QC protein, partial [Bos taurus]                                              |
| 74 | gi 942043090 | C4b-binding protein alpha chain isoform X1 [Bos mutus]                          |
| 75 | gi 741953400 | C4b-binding protein alpha chain isoform X3 [Bos taurus]                         |
| 76 | gi 741953405 | C4b-binding protein alpha chain isoform X6 [Bos taurus]                         |
| 77 | gi 440909392 | C4b-binding protein alpha chain, partial [Bos mutus]                            |
| 78 | gi 942043084 | C4b-binding protein alpha chain-like [Bos mutus]                                |
| 79 | gi 942088362 | caldesmon [Bos mutus]                                                           |
| 80 | gi 555985556 | carbonic anhydrase 2 [Bos mutus]                                                |
| 81 | gi 555969567 | carboxypeptidase B2 isoform X2 [Bos mutus]                                      |
| 82 | gi 440899513 | Carboxypeptidase N subunit 2 [Bos mutus]                                        |
| 83 | gi 440904009 | Cartilage oligomeric matrix protein [Bos mutus]                                 |
| 84 | gi 296486167 | cartilage oligomeric matrix protein [Bos taurus]                                |
| 85 | gi 73587261  | Cathepsin C [Bos taurus]                                                        |
| 86 | gi 74353837  | Cathepsin S [Bos taurus]                                                        |
| 87 | gi 255211    | cathepsin S [cattle, spleen, Peptide Partial, 217 aa]                           |
| 88 | gi 1419424   | CCP modules 3-12, with parts of CCP 2 and 13, partial [Bos taurus]              |
| 89 | gi 982946697 | CD44 antigen isoform X12 [Bos taurus]                                           |
| 90 | gi 942099671 | CD5 antigen-like [Bos mutus]                                                    |
| 91 | gi 741919372 | CD5 antigen-like isoform X2 [Bos taurus]                                        |

|     |              |                                                                                                                                                                                                                       |
|-----|--------------|-----------------------------------------------------------------------------------------------------------------------------------------------------------------------------------------------------------------------|
| 92  | gi 296489775 | CD5 molecule-like [Bos taurus]                                                                                                                                                                                        |
| 93  | gi 942041440 | CD59 glycoprotein [Bos mutus]                                                                                                                                                                                         |
| 94  | gi 151553956 | CD5L protein [Bos taurus]                                                                                                                                                                                             |
| 95  | gi 296491101 | ceruloplasmin (ferroxidase) [Bos taurus]                                                                                                                                                                              |
| 96  | gi 555981166 | ceruloplasmin [Bos mutus]                                                                                                                                                                                             |
| 97  | gi 528937555 | ceruloplasmin isoform X1 [Bos taurus]                                                                                                                                                                                 |
| 98  | gi 375065868 | ceruloplasmin precursor [Bos taurus]                                                                                                                                                                                  |
| 99  | gi 157830389 | Chain A, Crystal Structure Of Bovine Beta2-Microglobulin                                                                                                                                                              |
| 100 | gi 157838185 | Chain A, Crystal Structure Of Cleaved Bovine Antithrombin Iii At 3.2 Angstroms Resolution                                                                                                                             |
| 101 | gi 110590846 | Chain A, Structure Of Mammalian C3 With An Intact Thioester At 3a Resolution                                                                                                                                          |
| 102 | gi 197724902 | Chain B, Bovine Hemoglobin At Ph 6.3                                                                                                                                                                                  |
| 103 | gi 61680008  | Chain B, Crystal Structure Of Bovine Plasma Copper-Containing Amine Oxidase                                                                                                                                           |
| 104 | gi 407943892 | Chain B, Crystal Structure Of Bovine Serum Albumin                                                                                                                                                                    |
| 105 | gi 576144    | Chain C, A Novel Allosteric Mechanism In Haemoglobin. Structure Of Bovine Deoxyhaemoglobin, Absence Of Specific Chloride- Binding Sites And Origin Of The Chloride-Linked Bohr Effect In Bovine And Human Haemoglobin |
| 106 | gi 550544591 | Chain C, Crystal Structure Of A Human Mait Tcr In Complex With A Bacterial Antigen Bound To Humanized Bovine Mr1                                                                                                      |
| 107 | gi 513137421 | Chain H, Crystal Structure Of Bovine Antibody Blv1h12 With Ultralong Cdr H3                                                                                                                                           |
| 108 | gi 513137425 | Chain H, Crystal Structure Of Bovine Antibody Blv5b8 With Ultralong Cdr H3                                                                                                                                            |
| 109 | gi 513137426 | Chain L, Crystal Structure Of Bovine Antibody Blv5b8 With Ultralong Cdr H3                                                                                                                                            |
| 110 | gi 6980826   | Chain S, The Crystal Structure Of Modified Bovine Fibrinogen (At ~4 Angstrom Resolution)                                                                                                                              |
| 111 | gi 49259423  | Chain X, The Cys121ser Mutant Of Beta-lactoglobulin                                                                                                                                                                   |
| 112 | gi 440893934 | Charged multivesicular body protein 7 [Bos mutus]                                                                                                                                                                     |
| 113 | gi 982996542 | cilia- and flagella-associated protein 74 [Bos taurus]                                                                                                                                                                |
| 114 | gi 296490140 | ciliary rootlet coiled-coil, rootletin [Bos taurus]                                                                                                                                                                   |
| 115 | gi 94534834  | CL-43 protein [Bos taurus]                                                                                                                                                                                            |
| 116 | gi 555994901 | clusterin [Bos mutus]                                                                                                                                                                                                 |
| 117 | gi 27806907  | clusterin preproprotein [Bos taurus]                                                                                                                                                                                  |
| 118 | gi 75948172  | Coagulation factor II (thrombin) [Bos taurus]                                                                                                                                                                         |
| 119 | gi 555981040 | coagulation factor V [Bos mutus]                                                                                                                                                                                      |
| 120 | gi 27806943  | coagulation factor V precursor [Bos taurus]                                                                                                                                                                           |
| 121 | gi 942074092 | coagulation factor X [Bos mutus]                                                                                                                                                                                      |
| 122 | gi 942081298 | coagulation factor XII [Bos mutus]                                                                                                                                                                                    |
| 123 | gi 555958185 | coagulation factor XIII A chain [Bos mutus]                                                                                                                                                                           |
| 124 | gi 296473932 | coagulation factor XIII A chain precursor [Bos taurus]                                                                                                                                                                |
| 125 | gi 95767504  | coagulation factor XIII A1 subunit, partial [Bos taurus]                                                                                                                                                              |
| 126 | gi 440904870 | Coagulation factor XIII B chain [Bos mutus]                                                                                                                                                                           |
| 127 | gi 296478847 | coagulation factor XIII, B polypeptide [Bos taurus]                                                                                                                                                                   |
| 128 | gi 982977619 | coiled-coil domain-containing protein 150 isoform X2 [Bos taurus]                                                                                                                                                     |
| 129 | gi 741875499 | collagen alpha-3(VI) chain isoform X5 [Bos taurus]                                                                                                                                                                    |
| 130 | gi 75775290  | Collagen, type I, alpha 1 [Bos taurus]                                                                                                                                                                                |
| 131 | gi 440897853 | Complement C1q subcomponent subunit C, partial [Bos mutus]                                                                                                                                                            |
| 132 | gi 942090244 | complement C1r subcomponent [Bos mutus]                                                                                                                                                                               |
| 133 | gi 528950942 | complement C1r subcomponent isoform X2 [Bos taurus]                                                                                                                                                                   |
| 134 | gi 555991548 | complement C1s subcomponent [Bos mutus]                                                                                                                                                                               |
| 135 | gi 982963891 | complement C2 isoform X2 [Bos taurus]                                                                                                                                                                                 |

|     |              |                                                                                                                                                       |
|-----|--------------|-------------------------------------------------------------------------------------------------------------------------------------------------------|
| 136 | gi 77735935  | complement C2 precursor [Bos taurus]                                                                                                                  |
| 137 | gi 528955255 | complement C3 isoform X1 [Bos taurus]                                                                                                                 |
| 138 | gi 982930501 | complement C3 isoform X2 [Bos taurus]                                                                                                                 |
| 139 | gi 99028969  | complement C3 preproprotein [Bos taurus]                                                                                                              |
| 140 | gi 296474220 | complement C4 [Bos taurus]                                                                                                                            |
| 141 | gi 983005304 | complement C4 isoform X1 [Bos taurus]                                                                                                                 |
| 142 | gi 983005309 | complement C4 isoform X3 [Bos taurus]                                                                                                                 |
| 143 | gi 983005311 | complement C4 isoform X4 [Bos taurus]                                                                                                                 |
| 144 | gi 31563307  | Complement C4; Contains: Full=Complement C4 alpha chain; Contains: Full=C4a anaphylatoxin; Contains: Full=Complement C4 gamma chain; Flags: Precursor |
| 145 | gi 942049403 | complement C4-A [Bos mutus]                                                                                                                           |
| 146 | gi 983005314 | complement C4-A-like [Bos taurus]                                                                                                                     |
| 147 | gi 942102177 | complement C4-A-like, partial [Bos mutus]                                                                                                             |
| 148 | gi 555954772 | complement C5 [Bos mutus]                                                                                                                             |
| 149 | gi 296484326 | complement C5a anaphylatoxin [Bos taurus]                                                                                                             |
| 150 | gi 262205546 | complement C5a anaphylatoxin precursor [Bos taurus]                                                                                                   |
| 151 | gi 88683081  | Complement component 1, q subcomponent, A chain [Bos taurus]                                                                                          |
| 152 | gi 86438060  | Complement component 1, q subcomponent, B chain [Bos taurus]                                                                                          |
| 153 | gi 810213776 | complement component 3 [Bos taurus]                                                                                                                   |
| 154 | gi 146231832 | complement component 4 binding protein, alpha chain precursor [Bos taurus]                                                                            |
| 155 | gi 296479410 | complement component 4 binding protein, alpha chain-like [Bos taurus]                                                                                 |
| 156 | gi 810213780 | complement component 5 [Bos taurus]                                                                                                                   |
| 157 | gi 86438503  | Complement component 8, alpha polypeptide [Bos taurus]                                                                                                |
| 158 | gi 296489069 | complement component 8, beta polypeptide [Bos taurus]                                                                                                 |
| 159 | gi 555955243 | complement component C6 [Bos mutus]                                                                                                                   |
| 160 | gi 296475776 | complement component C6 precursor [Bos taurus]                                                                                                        |
| 161 | gi 555955241 | complement component C7 [Bos mutus]                                                                                                                   |
| 162 | gi 114051808 | complement component C7 precursor [Bos taurus]                                                                                                        |
| 163 | gi 296475775 | complement component C7 precursor [Bos taurus]                                                                                                        |
| 164 | gi 440899574 | Complement component C8 alpha chain [Bos mutus]                                                                                                       |
| 165 | gi 555982977 | complement component C8 beta chain [Bos mutus]                                                                                                        |
| 166 | gi 741944961 | complement component C8 gamma chain isoform X2 [Bos taurus]                                                                                           |
| 167 | gi 296475715 | complement component C9 precursor [Bos taurus]                                                                                                        |
| 168 | gi 555963521 | complement factor B [Bos mutus]                                                                                                                       |
| 169 | gi 86438491  | Complement factor B [Bos taurus]                                                                                                                      |
| 170 | gi 555996082 | complement factor D [Bos mutus]                                                                                                                       |
| 171 | gi 741933564 | complement factor D-like [Bos taurus]                                                                                                                 |
| 172 | gi 75948219  | Complement factor H [Bos taurus]                                                                                                                      |
| 173 | gi 942062627 | complement factor H, partial [Bos mutus]                                                                                                              |
| 174 | gi 982996119 | complement factor H-like [Bos taurus]                                                                                                                 |
| 175 | gi 296479360 | complement factor H-related 1-like isoform 1 [Bos taurus]                                                                                             |
| 176 | gi 297484447 | complement factor H-related protein 2 [Bos taurus]                                                                                                    |
| 177 | gi 982997359 | complement factor H-related protein 5 isoform X1 [Bos taurus]                                                                                         |
| 178 | gi 982997362 | complement factor H-related protein 5 isoform X2 [Bos taurus]                                                                                         |
| 179 | gi 84000165  | complement factor I precursor [Bos taurus]                                                                                                            |
| 180 | gi 741536    | component PP3                                                                                                                                         |
| 181 | gi 22852250  | conglutinin precursor [Bos taurus]                                                                                                                    |
| 182 | gi 31982388  | conglutinin precursor [Bos taurus]                                                                                                                    |

|     |              |                                                                                                                                                                                    |
|-----|--------------|------------------------------------------------------------------------------------------------------------------------------------------------------------------------------------|
| 183 | gi 741898667 | corticosteroid-binding globulin [Bos taurus]                                                                                                                                       |
| 184 | gi 982916018 | C-reactive protein isoform X1 [Bos taurus]                                                                                                                                         |
| 185 | gi 982968754 | deleted in malignant brain tumors 1 protein [Bos taurus]                                                                                                                           |
| 186 | gi 741942862 | E3 SUMO-protein ligase RanBP2 isoform X2 [Bos taurus]                                                                                                                              |
| 187 | gi 7649316   | elongation factor 1 alpha [Bos taurus]                                                                                                                                             |
| 188 | gi 296475221 | endopin 1b [Bos taurus]                                                                                                                                                            |
| 189 | gi 83405834  | Endopin 1b [Bos taurus]                                                                                                                                                            |
| 190 | gi 296475175 | endopin 2 [Bos taurus]                                                                                                                                                             |
| 191 | gi 38683423  | endopin 2B [Bos taurus]                                                                                                                                                            |
| 192 | gi 296475302 | endopin 2C-like [Bos taurus]                                                                                                                                                       |
| 193 | gi 942052392 | extracellular matrix protein 1 isoform X1 [Bos mutus]                                                                                                                              |
| 194 | gi 528942727 | extracellular matrix protein 1 isoform X2 [Bos taurus]                                                                                                                             |
| 195 | gi 741919958 | extracellular matrix protein 1 isoform X3 [Bos taurus]                                                                                                                             |
| 196 | gi 982928093 | extracellular superoxide dismutase [Cu-Zn] isoform X2 [Bos taurus]                                                                                                                 |
| 197 | gi 75773761  | F10 protein, partial [Bos taurus]                                                                                                                                                  |
| 198 | gi 86821856  | F11 protein [Bos taurus]                                                                                                                                                           |
| 199 | gi 528978722 | factor XIIa inhibitor isoform X1 [Bos taurus]                                                                                                                                      |
| 200 | gi 27807349  | factor XIIa inhibitor precursor [Bos taurus]                                                                                                                                       |
| 201 | gi 296491285 | fetuin-B precursor [Bos taurus]                                                                                                                                                    |
| 202 | gi 74267780  | FGG protein [Bos taurus]                                                                                                                                                           |
| 203 | gi 148745450 | Fibrinogen alpha chain [Bos taurus]                                                                                                                                                |
| 204 | gi 74354217  | Fibrinogen alpha chain [Bos taurus]                                                                                                                                                |
| 205 | gi 555979030 | fibrinogen alpha chain isoform X1 [Bos mutus]                                                                                                                                      |
| 206 | gi 555979030 | fibrinogen alpha chain isoform X1 [Bos mutus]                                                                                                                                      |
| 207 | gi 741955615 | fibrinogen alpha chain isoform X1 [Bos taurus]                                                                                                                                     |
| 208 | gi 942071249 | fibrinogen alpha chain isoform X2 [Bos mutus]                                                                                                                                      |
| 209 | gi 218931172 | fibrinogen beta chain precursor [Bos taurus]                                                                                                                                       |
| 210 | gi 555979024 | fibrinogen gamma chain isoform X2 [Bos mutus]                                                                                                                                      |
| 211 | gi 528940104 | fibronectin isoform X10 [Bos taurus]                                                                                                                                               |
| 212 | gi 942097090 | fibronectin isoform X13 [Bos mutus]                                                                                                                                                |
| 213 | gi 528940098 | fibronectin isoform X7 [Bos taurus]                                                                                                                                                |
| 214 | gi 942097080 | fibronectin isoform X8 [Bos mutus]                                                                                                                                                 |
| 215 | gi 296486900 | fibulin 1 [Bos taurus]                                                                                                                                                             |
| 216 | gi 942056121 | fibulin-1 [Bos mutus]                                                                                                                                                              |
| 217 | gi 440905574 | Fibulin-1, partial [Bos mutus]                                                                                                                                                     |
| 218 | gi 1091255   | flavin reductase                                                                                                                                                                   |
| 219 | gi 942091517 | four and a half LIM domains protein 1 isoform X5 [Bos mutus]                                                                                                                       |
| 220 | gi 440907052 | Fructose-bisphosphate aldolase A [Bos mutus]                                                                                                                                       |
| 221 | gi 46397335  | Full=Actin, cytoplasmic 1; AltName: Full=Beta-actin; Contains: Full=Actin, cytoplasmic 1, N-terminally processed                                                                   |
| 222 | gi 461603    | Full=Beta-2-microglobulin; AltName: Full=Lactollin; Flags: Precursor                                                                                                               |
| 223 | gi 824630452 | Full=Coagulation factor IX; AltName: Full=Christmas factor; Contains: Full=Coagulation factor IXa light chain; Contains: Full=Coagulation factor IXa heavy chain; Flags: Precursor |
| 224 | gi 1346006   | Full=Fibrinogen beta chain; Contains: Full=Fibrinopeptide B; Contains: Full=Fibrinogen beta chain; Flags: Precursor                                                                |
| 225 | gi 109829196 | Full=Fibroleukin; AltName: Full=Fibrinogen-like protein 2; Flags: Precursor                                                                                                        |
| 226 | gi 85682743  | Full=Glyceraldehyde-3-phosphate dehydrogenase; Short=GAPDH; AltName: Full=Peptidyl-cysteine S-nitrosylase GAPDH                                                                    |

|     |              |                                                                                                                                                                                                                                                                                                           |
|-----|--------------|-----------------------------------------------------------------------------------------------------------------------------------------------------------------------------------------------------------------------------------------------------------------------------------------------------------|
| 227 | gi 110831923 | Full=Hemoglobin subunit alpha; AltName: Full=Alpha-globin; AltName: Full=Hemoglobin alpha chain                                                                                                                                                                                                           |
| 228 | gi 13634094  | Full=Hemoglobin subunit alpha; AltName: Full=Alpha-globin; AltName: Full=Hemoglobin alpha chain                                                                                                                                                                                                           |
| 229 | gi 125506    | Full=Kininogen-2; AltName: Full=Kininogen II; AltName: Full=Thiol proteinase inhibitor; Contains: Full=Kininogen-2 heavy chain; Contains: Full=Bradykinin; AltName: Full=Kallidin I; Contains: Full=Lysyl-bradykinin; AltName: Full=Kallidin II; Contains: Full=Kininogen-2 light chain; Flags: Precursor |
| 230 | gi 38605375  | Full=Peptidoglycan recognition protein 1; AltName: Full=Oligosaccharide-binding protein; Short=OBP; AltName: Full=Peptidoglycan recognition protein short; Short=PGRP-S; Flags: Precursor                                                                                                                 |
| 231 | gi 400770    | Full=Phosphatidylinositol-glycan-specific phospholipase D; Short=PI-G PLD; AltName: Full=Glycoprotein phospholipase D; AltName: Full=Glycosyl-phosphatidylinositol-specific phospholipase D; Short=GPI-PLD; Short=GPI-specific phospholipase D; Flags: Precursor                                          |
| 232 | gi 3914346   | Full=Polymeric immunoglobulin receptor; Short=PIgR; Short=Poly-Ig receptor; Contains: Full=Secretory component; Flags: Precursor                                                                                                                                                                          |
| 233 | gi 2501335   | Full=Primary amine oxidase, liver isozyme; AltName: Full=Amine oxidase [copper-containing]; AltName: Full=Copper amine oxidase; AltName: Full=Serum amine oxidase; Short=SAO; Flags: Precursor                                                                                                            |
| 234 | gi 122136100 | Full=Protein HP-25 homolog 2; Flags: Precursor                                                                                                                                                                                                                                                            |
| 235 | gi 2501351   | Full=Serotransferrin; Short=Transferrin; AltName: Full=Beta-1 metal-binding globulin; AltName: Full=Siderophilin; Flags: Precursor                                                                                                                                                                        |
| 236 | gi 313471469 | Full=Serpina3-6; Flags: Precursor                                                                                                                                                                                                                                                                         |
| 237 | gi 93140718  | Full=Tubulin beta-4B chain; AltName: Full=Tubulin beta-2C chain                                                                                                                                                                                                                                           |
| 238 | gi 85701291  | Full=Vitamin D-binding protein; Short=DBP; Short=VDB; AltName: Full=Gc-globulin; AltName: Full=Group-specific component; Flags: Precursor                                                                                                                                                                 |
| 239 | gi 942098741 | galectin-3-binding protein isoform X2 [Bos mutus]                                                                                                                                                                                                                                                         |
| 240 | gi 555954370 | gamma-aminobutyric acid receptor subunit rho-1 [Bos mutus]                                                                                                                                                                                                                                                |
| 241 | gi 296484314 | gelsolin a [Bos taurus]                                                                                                                                                                                                                                                                                   |
| 242 | gi 77736201  | gelsolin isoform b [Bos taurus]                                                                                                                                                                                                                                                                           |
| 243 | gi 296488981 | guanylin-like [Bos taurus]                                                                                                                                                                                                                                                                                |
| 244 | gi 7579913   | Hageman factor, partial [Bos taurus]                                                                                                                                                                                                                                                                      |
| 245 | gi 83638561  | Haptoglobin [Bos taurus]                                                                                                                                                                                                                                                                                  |
| 246 | gi 296477882 | haptoglobin precursor [Bos taurus]                                                                                                                                                                                                                                                                        |
| 247 | gi 6006423   | hemoglobin alpha chain [Bos taurus]                                                                                                                                                                                                                                                                       |
| 248 | gi 6006425   | hemoglobin alpha chain [Bos taurus]                                                                                                                                                                                                                                                                       |
| 249 | gi 223905    | hemoglobin alphas                                                                                                                                                                                                                                                                                         |
| 250 | gi 294459651 | hemoglobin beta [Bos frontalis frontalis]                                                                                                                                                                                                                                                                 |
| 251 | gi 294459617 | hemoglobin beta [Bos indicus]                                                                                                                                                                                                                                                                             |
| 252 | gi 294459619 | hemoglobin beta [Bos indicus]                                                                                                                                                                                                                                                                             |
| 253 | gi 294459627 | hemoglobin beta [Bos javanicus javanicus]                                                                                                                                                                                                                                                                 |
| 254 | gi 223864    | hemoglobin beta Bali                                                                                                                                                                                                                                                                                      |
| 255 | gi 296479990 | hemoglobin fetal subunit beta-like [Bos taurus]                                                                                                                                                                                                                                                           |
| 256 | gi 223353    | hemoglobin lbeta                                                                                                                                                                                                                                                                                          |
| 257 | gi 942029061 | hemoglobin subunit alpha-1 [Bos mutus]                                                                                                                                                                                                                                                                    |
| 258 | gi 555992414 | hemoglobin subunit beta [Bos mutus]                                                                                                                                                                                                                                                                       |
| 259 | gi 160333301 | hemoglobin, gamma 2 [Bos taurus]                                                                                                                                                                                                                                                                          |
| 260 | gi 555990772 | hemopexin [Bos mutus]                                                                                                                                                                                                                                                                                     |
| 261 | gi 77736171  | hemopexin precursor [Bos taurus]                                                                                                                                                                                                                                                                          |
| 262 | gi 942064847 | heparin cofactor 2 [Bos mutus]                                                                                                                                                                                                                                                                            |

|     |              |                                                                                             |
|-----|--------------|---------------------------------------------------------------------------------------------|
| 263 | gi 528989611 | heparin cofactor 2 isoform X1 [Bos taurus]                                                  |
| 264 | gi 942051006 | hepatocyte growth factor activator isoform X3 [Bos mutus]                                   |
| 265 | gi 333360891 | hepatocyte growth factor activator preproprotein [Bos taurus]                               |
| 266 | gi 555960159 | hepatocyte growth factor-like protein [Bos mutus]                                           |
| 267 | gi 1072452   | histidine-rich glycoprotein - bovine (fragments)                                            |
| 268 | gi 555998220 | histidine-rich glycoprotein [Bos mutus]                                                     |
| 269 | gi 27806875  | histidine-rich glycoprotein precursor [Bos taurus]                                          |
| 270 | gi 134085671 | histone H1.2 [Bos taurus]                                                                   |
| 271 | gi 555968013 | histone H2A type 1-like [Bos mutus]                                                         |
| 272 | gi 982980171 | histone H2B type 1 [Bos taurus]                                                             |
| 273 | gi 555960344 | histone H2B type 1-B [Bos mutus]                                                            |
| 274 | gi 982980274 | histone H4 isoform X2, partial [Bos taurus]                                                 |
| 275 | gi 256860914 | HP-25 [Bos taurus]                                                                          |
| 276 | gi 440907257 | hypothetical protein M91_03189, partial [Bos mutus]                                         |
| 277 | gi 440900222 | hypothetical protein M91_13280 [Bos mutus]                                                  |
| 278 | gi 440893976 | hypothetical protein M91_13457, partial [Bos mutus]                                         |
| 279 | gi 440893977 | hypothetical protein M91_13458, partial [Bos mutus]                                         |
| 280 | gi 440893980 | hypothetical protein M91_13462, partial [Bos mutus]                                         |
| 281 | gi 440890143 | hypothetical protein M91_14552, partial [Bos mutus]                                         |
| 282 | gi 440890144 | hypothetical protein M91_14553, partial [Bos mutus]                                         |
| 283 | gi 440910795 | hypothetical protein M91_19289, partial [Bos mutus]                                         |
| 284 | gi 440910796 | hypothetical protein M91_19291, partial [Bos mutus]                                         |
| 285 | gi 555992242 | inhibitor of carbonic anhydrase [Bos mutus]                                                 |
| 286 | gi 528937964 | inhibitor of carbonic anhydrase isoform X1 [Bos taurus]                                     |
| 287 | gi 9664869   | insulin-like growth factor 2, partial [Bos indicus]                                         |
| 288 | gi 90823112  | insulin-like growth factor binding protein acid labile subunit [Bos taurus]                 |
| 289 | gi 11095303  | insulin-like growth factor binding protein-3 [Bos taurus]                                   |
| 290 | gi 163190    | insulin-like growth factor binding protein-3 [Bos taurus]                                   |
| 291 | gi 982925531 | insulin-like growth factor I isoform X4 [Bos taurus]                                        |
| 292 | gi 27807005  | insulin-like growth factor-binding protein 2 precursor [Bos taurus]                         |
| 293 | gi 296490277 | insulin-like growth factor-binding protein 2 precursor [Bos taurus]                         |
| 294 | gi 555972189 | insulin-like growth factor-binding protein 4 [Bos mutus]                                    |
| 295 | gi 741917592 | insulin-like growth factor-binding protein 5 isoform X1 [Bos taurus]                        |
| 296 | gi 942028887 | insulin-like growth factor-binding protein complex acid labile subunit [Bos mutus]          |
| 297 | gi 111308523 | Inter-alpha (globulin) inhibitor H1 [Bos taurus]                                            |
| 298 | gi 59857769  | inter-alpha (globulin) inhibitor H4 (plasma Kallikrein-sensitive glycoprotein) [Bos taurus] |
| 299 | gi 296481520 | inter-alpha globulin inhibitor H2 polypeptide [Bos taurus]                                  |
| 300 | gi 296481520 | inter-alpha globulin inhibitor H2 polypeptide [Bos taurus]                                  |
| 301 | gi 555969038 | inter-alpha-trypsin inhibitor heavy chain H1 [Bos mutus]                                    |
| 302 | gi 529001398 | inter-alpha-trypsin inhibitor heavy chain H1 isoform X1 [Bos taurus]                        |
| 303 | gi 555967027 | inter-alpha-trypsin inhibitor heavy chain H2 [Bos mutus]                                    |
| 304 | gi 982961876 | inter-alpha-trypsin inhibitor heavy chain H3 isoform X1 [Bos taurus]                        |
| 305 | gi 156120445 | inter-alpha-trypsin inhibitor heavy chain H3 precursor [Bos taurus]                         |
| 306 | gi 555969034 | inter-alpha-trypsin inhibitor heavy chain H4 [Bos mutus]                                    |
| 307 | gi 982961939 | inter-alpha-trypsin inhibitor heavy chain H4 isoform X2 [Bos taurus]                        |
| 308 | gi 296474801 | inter-alpha-trypsin inhibitor heavy chain H4 precursor [Bos taurus]                         |
| 309 | gi 56710317  | keratin, type II cytoskeletal 5 [Bos taurus]                                                |



|     |              |                                                                              |
|-----|--------------|------------------------------------------------------------------------------|
| 310 | gi 440896118 | Keratin, type II cytoskeletal 6A [Bos mutus]                                 |
| 311 | gi 942093051 | keratinocyte differentiation-associated protein isoform X2 [Bos mutus]       |
| 312 | gi 741962669 | kinesin-like protein KIF1C isoform X2 [Bos taurus]                           |
| 313 | gi 222986    | kininogen fragment,low MW                                                    |
| 314 | gi 488       | kininogen I precursor [Bos taurus]                                           |
| 315 | gi 490       | kininogen II precursor [Bos taurus]                                          |
| 316 | gi 440891699 | Kininogen-1 [Bos mutus]                                                      |
| 317 | gi 555998222 | kininogen-1 isoform X2 [Bos mutus]                                           |
| 318 | gi 555998224 | kininogen-1 isoform X3 [Bos mutus]                                           |
| 319 | gi 164450479 | kininogen-2 isoform I precursor [Bos taurus]                                 |
| 320 | gi 528936694 | kininogen-2 isoform X1 [Bos taurus]                                          |
| 321 | gi 146157606 | lactoferrin [Bos indicus x Bos taurus]                                       |
| 322 | gi 408926    | lactoferrin [Bos taurus]                                                     |
| 323 | gi 9650974   | lactoferrin [Bos taurus]                                                     |
| 324 | gi 86826324  | Leucine-rich alpha-2-glycoprotein 1 [Bos taurus]                             |
| 325 | gi 83759164  | Lipopolysaccharide binding protein [Bos taurus]                              |
| 326 | gi 555968021 | lipopolysaccharide-binding protein [Bos mutus]                               |
| 327 | gi 938326464 | L-lactate dehydrogenase B chain isoform LDHBx [Bos taurus]                   |
| 328 | gi 81673144  | LOC504773 protein [Bos taurus]                                               |
| 329 | gi 74354899  | Lumican [Bos taurus]                                                         |
| 330 | gi 982981096 | maltase-glucoamylase, intestinal isoform X1 [Bos taurus]                     |
| 331 | gi 982910626 | mannan-binding lectin serine protease 1 isoform X3 [Bos taurus]              |
| 332 | gi 982947887 | mannan-binding lectin serine protease 2 isoform X1 [Bos taurus]              |
| 333 | gi 440910925 | Mannose-binding protein C [Bos mutus]                                        |
| 334 | gi 741925540 | methyltransferase-like protein 25 isoform X1 [Bos taurus]                    |
| 335 | gi 84095083  | MHC class I antigen [Bos taurus]                                             |
| 336 | gi 296474233 | MHC Class I JSP.1 [Bos taurus]                                               |
| 337 | gi 73586735  | Myoglobin [Bos taurus]                                                       |
| 338 | gi 555984640 | N-acetylmuramoyl-L-alanine amidase [Bos mutus]                               |
| 339 | gi 555979010 | nuclease-sensitive element-binding protein 1 [Bos mutus]                     |
| 340 | gi 555979930 | osteomodulin [Bos mutus]                                                     |
| 341 | gi 296487631 | ovarian and testicular apolipoprotein N [Bos taurus]                         |
| 342 | gi 942032752 | pantetheinase isoform X2 [Bos mutus]                                         |
| 343 | gi 296486107 | peptidoglycan recognition protein L-like [Bos taurus]                        |
| 344 | gi 555990836 | periostin isoform X5 [Bos mutus]                                             |
| 345 | gi 86823983  | Periostin, osteoblast specific factor [Bos taurus]                           |
| 346 | gi 942068958 | peroxiredoxin-2 [Bos mutus]                                                  |
| 347 | gi 440905425 | Phosphatidylcholine-sterol acyltransferase [Bos mutus]                       |
| 348 | gi 296477942 | phosphatidylcholine-sterol acyltransferase [Bos taurus]                      |
| 349 | gi 741958184 | phosphatidylcholine-sterol acyltransferase isoform X1 [Bos taurus]           |
| 350 | gi 982928075 | phosphatidylinositol 4-kinase type 2-beta isoform X2 [Bos taurus]            |
| 351 | gi 555982613 | phosphatidylinositol-glycan-specific phospholipase D [Bos mutus]             |
| 352 | gi 982964313 | phosphatidylinositol-glycan-specific phospholipase D isoform X1 [Bos taurus] |
| 353 | gi 73587283  | PKM2 protein, partial [Bos taurus]                                           |
| 354 | gi 942064061 | plasma kallikrein [Bos mutus]                                                |
| 355 | gi 296472427 | plasma kallikrein precursor [Bos taurus]                                     |
| 356 | gi 555958159 | plasma protease C1 inhibitor [Bos mutus]                                     |

|     |              |                                                                                                                 |
|-----|--------------|-----------------------------------------------------------------------------------------------------------------|
| 357 | gi 440905713 | Plasma serine protease inhibitor [Bos mutus]                                                                    |
| 358 | gi 296475172 | plasma serine protease inhibitor precursor [Bos taurus]                                                         |
| 359 | gi 494963    | plasminogen [Bos taurus]                                                                                        |
| 360 | gi 555977002 | plasminogen isoform X5 [Bos mutus]                                                                              |
| 361 | gi 296483851 | plasminogen precursor [Bos taurus]                                                                              |
| 362 | gi 942057082 | plastin-2 [Bos mutus]                                                                                           |
| 363 | gi 297475989 | platelet basic protein [Bos taurus]                                                                             |
| 364 | gi 555958381 | platelet factor 4 [Bos mutus]                                                                                   |
| 365 | gi 162296326 | PON1 [Bos taurus]                                                                                               |
| 366 | gi 492       | prekininogen [Bos taurus]                                                                                       |
| 367 | gi 83764016  | prepro complement component C3 [Bos taurus]                                                                     |
| 368 | gi 741896632 | primary amine oxidase, liver isozyme isoform X1 [Bos taurus]                                                    |
| 369 | gi 741963933 | primary amine oxidase, liver isozyme isoform X2 [Bos taurus]                                                    |
| 370 | gi 440893900 | Primary amine oxidase, liver isozyme, partial [Bos mutus]                                                       |
| 371 | gi 87578362  | Procollagen C-endopeptidase enhancer [Bos taurus]                                                               |
| 372 | gi 555974866 | properdin [Bos mutus]                                                                                           |
| 373 | gi 115495873 | properdin precursor [Bos taurus]                                                                                |
| 374 | gi 296484341 | protein AMBP precursor [Bos taurus]                                                                             |
| 375 | gi 942042388 | protein CutA [Bos mutus]                                                                                        |
| 376 | gi 741969991 | protein CutA isoform X1 [Bos taurus]                                                                            |
| 377 | gi 555972795 | protein HP-20 homolog isoform X1 [Bos mutus]                                                                    |
| 378 | gi 942061299 | protein HP-20 homolog isoform X2 [Bos mutus]                                                                    |
| 379 | gi 555972797 | protein HP-25 homolog 2 [Bos mutus]                                                                             |
| 380 | gi 440903969 | Protein HP-25-like protein 1 [Bos mutus]                                                                        |
| 381 | gi 440905707 | Protein Z-dependent protease inhibitor [Bos mutus]                                                              |
| 382 | gi 149642955 | protein Z-dependent protease inhibitor precursor [Bos taurus]                                                   |
| 383 | gi 296478893 | proteoglycan 4 [Bos taurus]                                                                                     |
| 384 | gi 528978409 | prothrombin isoform X1 [Bos taurus]                                                                             |
| 385 | gi 27806947  | prothrombin precursor [Bos taurus]                                                                              |
| 386 | gi 81674813  | RBP4 protein [Bos taurus]                                                                                       |
| 387 | gi 296477001 | regakine-1 precursor [Bos taurus]                                                                               |
| 388 | gi 555957149 | retinol-binding protein 4 [Bos mutus]                                                                           |
| 389 | gi 296472650 | retinol-binding protein 4 [Bos taurus]                                                                          |
| 390 | gi 555963029 | rho guanine nucleotide exchange factor 17 [Bos mutus]                                                           |
| 391 | gi 158454980 | Ribonuclease, RNase A family, 4 [Bos taurus]                                                                    |
| 392 | gi 555991717 | ribosomal RNA processing protein 1 homolog A isoform X1 [Bos mutus]                                             |
| 393 | gi 555991719 | ribosomal RNA processing protein 1 homolog A isoform X2 [Bos mutus]                                             |
| 394 | gi 982991949 | sacsin isoform X2 [Bos taurus]                                                                                  |
| 395 | gi 449500    | selenium-dependent glutathione peroxidase                                                                       |
| 396 | gi 95769204  | serine (or cysteine) proteinase inhibitor, clade A (alpha-1 antiproteinase, antitrypsin), member 1 [Bos taurus] |
| 397 | gi 440895298 | Serotransferrin [Bos mutus]                                                                                     |
| 398 | gi 114326282 | serotransferrin precursor [Bos taurus]                                                                          |
| 399 | gi 296490958 | serotransferrin precursor [Bos taurus]                                                                          |
| 400 | gi 88682970  | Serotransferrin-like [Bos taurus]                                                                               |
| 401 | gi 555998463 | serpin A3-3 [Bos mutus]                                                                                         |
| 402 | gi 296475157 | serpin A3-6 [Bos taurus]                                                                                        |
| 403 | gi 555992238 | serpin A3-7 [Bos mutus]                                                                                         |

|     |              |                                                                                                                     |
|-----|--------------|---------------------------------------------------------------------------------------------------------------------|
| 404 | gi 75832097  | serpin A3-7 precursor [Bos taurus]                                                                                  |
| 405 | gi 985701132 | serpin A3-7-like precursor [Bos taurus]                                                                             |
| 406 | gi 555964497 | serpin A3-8 [Bos mutus]                                                                                             |
| 407 | gi 528999831 | serpin A3-8 isoform X1 [Bos taurus]                                                                                 |
| 408 | gi 528978042 | serpin H1 isoform X1 [Bos taurus]                                                                                   |
| 409 | gi 296475228 | serpin peptidase inhibitor, clade A (alpha-1 antiproteinase, antitrypsin), member 3 [Bos taurus]                    |
| 410 | gi 86438524  | Serpin peptidase inhibitor, clade F (alpha-2 antiplasmin, pigment epithelium derived factor), member 1 [Bos taurus] |
| 411 | gi 86438018  | SERPINA3 protein [Bos taurus]                                                                                       |
| 412 | gi 121531626 | SERPINA3-2 [Bos taurus]                                                                                             |
| 413 | gi 121531628 | SERPINA3-4 [Bos taurus]                                                                                             |
| 414 | gi 121531630 | SERPINA3-5 [Bos taurus]                                                                                             |
| 415 | gi 555958369 | serum albumin [Bos mutus]                                                                                           |
| 416 | gi 296486410 | serum albumin precursor [Bos taurus]                                                                                |
| 417 | gi 555977609 | serum amyloid A protein [Bos mutus]                                                                                 |
| 418 | gi 741979396 | serum amyloid A protein isoform X1 [Bos taurus]                                                                     |
| 419 | gi 741979398 | serum amyloid A protein isoform X2 [Bos taurus]                                                                     |
| 420 | gi 983009584 | serum amyloid A protein-like [Bos taurus]                                                                           |
| 421 | gi 942053804 | serum amyloid A-4 protein isoform X1 [Bos mutus]                                                                    |
| 422 | gi 982971312 | serum amyloid A-4 protein isoform X1 [Bos taurus]                                                                   |
| 423 | gi 942093437 | serum amyloid P-component isoform X1 [Bos mutus]                                                                    |
| 424 | gi 440893303 | Serum paraoxonase/arylesterase 1 [Bos mutus]                                                                        |
| 425 | gi 528995105 | sex hormone-binding globulin isoform X1 [Bos taurus]                                                                |
| 426 | gi 741962906 | sex hormone-binding globulin isoform X2 [Bos taurus]                                                                |
| 427 | gi 45429979  | spleen trypsin inhibitor I precursor [Bos taurus]                                                                   |
| 428 | gi 555968261 | tetranectin [Bos mutus]                                                                                             |
| 429 | gi 74356399  | Thrombospondin 4 [Bos taurus]                                                                                       |
| 430 | gi 942035840 | thrombospondin-1 [Bos mutus]                                                                                        |
| 431 | gi 41386685  | thrombospondin-1 precursor [Bos taurus]                                                                             |
| 432 | gi 296482454 | thymosin beta-10 [Bos taurus]                                                                                       |
| 433 | gi 942041683 | thymosin beta-4 isoform X1 [Bos mutus]                                                                              |
| 434 | gi 296480569 | thymosin, beta 4-like [Bos taurus]                                                                                  |
| 435 | gi 982973208 | thyroxine-binding globulin isoform X1 [Bos taurus]                                                                  |
| 436 | gi 102527398 | TPA_inf: hepatitis A virus cellular receptor 1 N-terminal domain containing protein [Bos taurus]                    |
| 437 | gi 334265666 | TPA_inf: von Willebrand factor [Bos taurus]                                                                         |
| 438 | gi 209973077 | transferrin [Bos grunniens]                                                                                         |
| 439 | gi 440910443 | Transforming growth factor-beta-induced protein ig-h3 [Bos mutus]                                                   |
| 440 | gi 59858295  | transgelin 2 [Bos taurus]                                                                                           |
| 441 | gi 440901679 | Transthyretin [Bos mutus]                                                                                           |
| 442 | gi 2696504   | transthyretin [Bos taurus]                                                                                          |
| 443 | gi 555968942 | trem-like transcript 1 protein [Bos mutus]                                                                          |
| 444 | gi 528954501 | tropomyosin alpha-4 chain isoform X3 [Bos taurus]                                                                   |
| 445 | gi 942069538 | tropomyosin beta chain isoform X1 [Bos mutus]                                                                       |
| 446 | gi 115495991 | uncharacterized protein LOC510860 precursor [Bos taurus]                                                            |
| 447 | gi 982916735 | uncharacterized protein LOC516742 [Bos taurus]                                                                      |
| 448 | gi 157279963 | uncharacterized protein LOC790886 precursor [Bos taurus]                                                            |

|     |              |                                                                        |
|-----|--------------|------------------------------------------------------------------------|
| 449 | gi 146186536 | Unknown (protein for MGC:148283) [Bos taurus]                          |
| 450 | gi 151556360 | Unknown (protein for MGC:159378) [Bos taurus]                          |
| 451 | gi 148878143 | Unknown (protein for MGC:159411) [Bos taurus]                          |
| 452 | gi 148744128 | Unknown (protein for MGC:159455) [Bos taurus]                          |
| 453 | gi 295032043 | unnamed protein product [Bos taurus]                                   |
| 454 | gi 1364185   | unnamed protein product, partial [Bos taurus]                          |
| 455 | gi 155372041 | vascular cell adhesion molecule 1-like precursor [Bos taurus]          |
| 456 | gi 982970459 | vinculin isoform X4 [Bos taurus]                                       |
| 457 | gi 397740864 | vitamin D binding protein [Bos taurus]                                 |
| 458 | gi 942057836 | vitamin D-binding protein [Bos mutus]                                  |
| 459 | gi 982912808 | vitamin K-dependent protein C isoform X3 [Bos taurus]                  |
| 460 | gi 555961878 | vitamin K-dependent protein S [Bos mutus]                              |
| 461 | gi 440895896 | Vitronectin [Bos mutus]                                                |
| 462 | gi 296476844 | vitronectin [Bos taurus]                                               |
| 463 | gi 942054053 | von Willebrand factor [Bos mutus]                                      |
| 464 | gi 358417209 | WAP four-disulfide core domain protein 18-like [Bos taurus]            |
| 465 | gi 555962213 | zinc-alpha-2-glycoprotein [Bos mutus]                                  |
| 466 | gi 296472930 | zinc-alpha-2-glycoprotein precursor [Bos taurus]                       |
| 467 | gi 555949153 | zyxin [Bos mutus]                                                      |
| 468 | gi 440890535 | Ig epsilon chain C region, partial [Bos mutus]                         |
| 469 | gi 89611     | Ig gamma-2 chain C region (clone 32.2) - bovine (fragment)             |
| 470 | gi 440890534 | Ig gamma-3 chain C region, partial [Bos mutus]                         |
| 471 | gi 983012461 | Ig heavy chain Mem5, partial [Bos taurus]                              |
| 472 | gi 982951043 | Ig heavy chain Mem5-like [Bos taurus]                                  |
| 473 | gi 741911706 | Ig heavy chain Mem5-like, partial [Bos taurus]                         |
| 474 | gi 983004227 | Ig heavy chain Mem5-like, partial [Bos taurus]                         |
| 475 | gi 983004231 | Ig heavy chain V region PJ14 isoform X3 [Bos taurus]                   |
| 476 | gi 440894706 | Ig kappa chain C region [Bos mutus]                                    |
| 477 | gi 440894708 | Ig kappa chain V-I region Walker, partial [Bos mutus]                  |
| 478 | gi 440894559 | Ig kappa chain V-II region RPMI 6410, partial [Bos mutus]              |
| 479 | gi 942095460 | Ig lambda chain V-III region SH [Bos mutus]                            |
| 480 | gi 942095460 | Ig lambda chain V-III region SH [Bos mutus]                            |
| 481 | gi 942095463 | Ig lambda chain V-IV region Hil [Bos mutus]                            |
| 482 | gi 7547266   | IgG1 heavy chain constant region, partial [Bos taurus]                 |
| 483 | gi 1493797   | IgG1 heavy chain, partial (plasmid) [Bos taurus]                       |
| 484 | gi 1699167   | IgG2a heavy chain constant region, partial [Bos taurus]                |
| 485 | gi 1575493   | IgG3 heavy chain constant region, partial [Bos taurus]                 |
| 486 | gi 1575495   | IgG3 heavy chain constant region, partial [Bos taurus]                 |
| 487 | gi 115545495 | IGK protein [Bos taurus]                                               |
| 488 | gi 154425814 | IGK protein [Bos taurus]                                               |
| 489 | gi 296482543 | IGK protein-like [Bos taurus]                                          |
| 490 | gi 74353860  | IGL@ protein [Bos taurus]                                              |
| 491 | gi 28592070  | IgM heavy chain constant region, secretory form, partial [Bos taurus]  |
| 492 | gi 4680177   | immunoglobulin light chain VJ region, partial [Bos taurus]             |
| 493 | gi 509264888 | immunoglobulin alpha heavy chain variable region, partial [Bos taurus] |
| 494 | gi 509264897 | immunoglobulin alpha heavy chain variable region, partial [Bos taurus] |
| 495 | gi 509264906 | immunoglobulin alpha heavy chain variable region, partial [Bos taurus] |

|     |              |                                                                            |
|-----|--------------|----------------------------------------------------------------------------|
| 496 | gi 509264957 | immunoglobulin alpha heavy chain variable region, partial [Bos taurus]     |
| 497 | gi 509264984 | immunoglobulin alpha heavy chain variable region, partial [Bos taurus]     |
| 498 | gi 22773998  | immunoglobulin delta heavy chain membrane bound form, partial [Bos taurus] |
| 499 | gi 509264401 | immunoglobulin delta heavy chain variable region, partial [Bos taurus]     |
| 500 | gi 509264433 | immunoglobulin delta heavy chain variable region, partial [Bos taurus]     |
| 501 | gi 509264436 | immunoglobulin delta heavy chain variable region, partial [Bos taurus]     |
| 502 | gi 509264464 | immunoglobulin delta heavy chain variable region, partial [Bos taurus]     |
| 503 | gi 509264466 | immunoglobulin delta heavy chain variable region, partial [Bos taurus]     |
| 504 | gi 509264473 | immunoglobulin delta heavy chain variable region, partial [Bos taurus]     |
| 505 | gi 509264513 | immunoglobulin delta heavy chain variable region, partial [Bos taurus]     |
| 506 | gi 509264531 | immunoglobulin delta heavy chain variable region, partial [Bos taurus]     |
| 507 | gi 33413900  | immunoglobulin epsilon heavy chain constant region, partial [Bos taurus]   |
| 508 | gi 509264755 | immunoglobulin epsilon heavy chain variable region, partial [Bos taurus]   |
| 509 | gi 509264776 | immunoglobulin epsilon heavy chain variable region, partial [Bos taurus]   |
| 510 | gi 509264813 | immunoglobulin epsilon heavy chain variable region, partial [Bos taurus]   |
| 511 | gi 509264827 | immunoglobulin epsilon heavy chain variable region, partial [Bos taurus]   |
| 512 | gi 509264841 | immunoglobulin epsilon heavy chain variable region, partial [Bos taurus]   |
| 513 | gi 509264854 | immunoglobulin epsilon heavy chain variable region, partial [Bos taurus]   |
| 514 | gi 509264861 | immunoglobulin epsilon heavy chain variable region, partial [Bos taurus]   |
| 515 | gi 509264868 | immunoglobulin epsilon heavy chain variable region, partial [Bos taurus]   |
| 516 | gi 509264882 | immunoglobulin epsilon heavy chain variable region, partial [Bos taurus]   |
| 517 | gi 91982959  | immunoglobulin gamma 1 heavy chain constant region, partial [Bos taurus]   |
| 518 | gi 509264670 | immunoglobulin gamma heavy chain variable region, partial [Bos taurus]     |
| 519 | gi 509264677 | immunoglobulin gamma heavy chain variable region, partial [Bos taurus]     |
| 520 | gi 509264697 | immunoglobulin gamma heavy chain variable region, partial [Bos taurus]     |
| 521 | gi 509264712 | immunoglobulin gamma heavy chain variable region, partial [Bos taurus]     |
| 522 | gi 509264725 | immunoglobulin gamma heavy chain variable region, partial [Bos taurus]     |
| 523 | gi 94961500  | immunoglobulin gamma heavy chain variable region, partial [Bos taurus]     |
| 524 | gi 94961510  | immunoglobulin gamma heavy chain variable region, partial [Bos taurus]     |
| 525 | gi 94961520  | immunoglobulin gamma heavy chain variable region, partial [Bos taurus]     |
| 526 | gi 94961524  | immunoglobulin gamma heavy chain variable region, partial [Bos taurus]     |
| 527 | gi 94961528  | immunoglobulin gamma heavy chain variable region, partial [Bos taurus]     |
| 528 | gi 94961534  | immunoglobulin gamma heavy chain variable region, partial [Bos taurus]     |
| 529 | gi 34538498  | immunoglobulin heavy chain constant region, partial [Bos taurus]           |
| 530 | gi 3834667   | immunoglobulin heavy chain constant region, partial [Bos taurus]           |
| 531 | gi 1000346   | immunoglobulin heavy chain variable region, partial [Bos taurus]           |
| 532 | gi 1293580   | immunoglobulin heavy chain variable region, partial [Bos taurus]           |
| 533 | gi 1293590   | immunoglobulin heavy chain variable region, partial [Bos taurus]           |
| 534 | gi 1293592   | immunoglobulin heavy chain variable region, partial [Bos taurus]           |
| 535 | gi 1293598   | immunoglobulin heavy chain variable region, partial [Bos taurus]           |
| 536 | gi 1293604   | immunoglobulin heavy chain variable region, partial [Bos taurus]           |
| 537 | gi 1293606   | immunoglobulin heavy chain variable region, partial [Bos taurus]           |
| 538 | gi 1293610   | immunoglobulin heavy chain variable region, partial [Bos taurus]           |
| 539 | gi 1293612   | immunoglobulin heavy chain variable region, partial [Bos taurus]           |
| 540 | gi 2145031   | immunoglobulin heavy chain variable region, partial [Bos taurus]           |
| 541 | gi 24459869  | immunoglobulin heavy chain variable region, partial [Bos taurus]           |
| 542 | gi 373427753 | immunoglobulin heavy chain variable region, partial [Bos taurus]           |

|     |              |                                                                                                    |
|-----|--------------|----------------------------------------------------------------------------------------------------|
| 543 | gi 373427757 | immunoglobulin heavy chain variable region, partial [Bos taurus]                                   |
| 544 | gi 3834651   | immunoglobulin heavy chain variable region, partial [Bos taurus]                                   |
| 545 | gi 3834665   | immunoglobulin heavy chain variable region, partial [Bos taurus]                                   |
| 546 | gi 3892110   | immunoglobulin heavy chain variable region, partial [Bos taurus]                                   |
| 547 | gi 3892112   | immunoglobulin heavy chain variable region, partial [Bos taurus]                                   |
| 548 | gi 3892118   | immunoglobulin heavy chain variable region, partial [Bos taurus]                                   |
| 549 | gi 3892122   | immunoglobulin heavy chain variable region, partial [Bos taurus]                                   |
| 550 | gi 662033942 | immunoglobulin heavy chain variable region, partial [Bos taurus]                                   |
| 551 | gi 662033951 | immunoglobulin heavy chain variable region, partial [Bos taurus]                                   |
| 552 | gi 662033967 | immunoglobulin heavy chain variable region, partial [Bos taurus]                                   |
| 553 | gi 662033969 | immunoglobulin heavy chain variable region, partial [Bos taurus]                                   |
| 554 | gi 662033973 | immunoglobulin heavy chain variable region, partial [Bos taurus]                                   |
| 555 | gi 662033979 | immunoglobulin heavy chain variable region, partial [Bos taurus]                                   |
| 556 | gi 662033983 | immunoglobulin heavy chain variable region, partial [Bos taurus]                                   |
| 557 | gi 662033989 | immunoglobulin heavy chain variable region, partial [Bos taurus]                                   |
| 558 | gi 662033991 | immunoglobulin heavy chain variable region, partial [Bos taurus]                                   |
| 559 | gi 94502743  | immunoglobulin heavy chain variable region, partial [Bos taurus]                                   |
| 560 | gi 995923    | immunoglobulin heavy chain variable region, partial [Bos taurus]                                   |
| 561 | gi 995927    | immunoglobulin heavy chain variable region, partial [Bos taurus]                                   |
| 562 | gi 1322318   | immunoglobulin heavy chain, partial [Bos taurus]                                                   |
| 563 | gi 1322334   | immunoglobulin heavy chain, partial [Bos taurus]                                                   |
| 564 | gi 1335945   | immunoglobulin heavy chain, partial [Bos taurus]                                                   |
| 565 | gi 1335949   | immunoglobulin heavy chain, partial [Bos taurus]                                                   |
| 566 | gi 1335951   | immunoglobulin heavy chain, partial [Bos taurus]                                                   |
| 567 | gi 1335961   | immunoglobulin heavy chain, partial [Bos taurus]                                                   |
| 568 | gi 94981788  | immunoglobulin heavy chain, partial [Bos taurus]                                                   |
| 569 | gi 296478322 | immunoglobulin iota chain-like [Bos taurus]                                                        |
| 570 | gi 74268358  | Immunoglobulin J chain [Bos taurus]                                                                |
| 571 | gi 942057896 | immunoglobulin J chain isoform X2 [Bos mutus]                                                      |
| 572 | gi 343482369 | immunoglobulin kappa light chain constant region, partial [Bos taurus]                             |
| 573 | gi 15088675  | immunoglobulin lambda light chain [Bos taurus]                                                     |
| 574 | gi 343197002 | immunoglobulin lambda light chain constant region 2 allotypic variant IGLC2a, partial [Bos taurus] |
| 575 | gi 343197006 | immunoglobulin lambda light chain constant region 2 allotypic variant IGLC2b, partial [Bos taurus] |
| 576 | gi 343197024 | immunoglobulin lambda light chain constant region 3 allotypic variant IGLC3b, partial [Bos taurus] |
| 577 | gi 343197028 | immunoglobulin lambda light chain constant region 3 allotypic variant IGLC3c, partial [Bos taurus] |
| 578 | gi 1276599   | immunoglobulin lambda light chain variable region, partial [Bos taurus]                            |
| 579 | gi 1276605   | immunoglobulin lambda light chain variable region, partial [Bos taurus]                            |
| 580 | gi 1276607   | immunoglobulin lambda light chain variable region, partial [Bos taurus]                            |
| 581 | gi 1276609   | immunoglobulin lambda light chain variable region, partial [Bos taurus]                            |
| 582 | gi 1276611   | immunoglobulin lambda light chain variable region, partial [Bos taurus]                            |
| 583 | gi 1276615   | immunoglobulin lambda light chain variable region, partial [Bos taurus]                            |
| 584 | gi 1276619   | immunoglobulin lambda light chain variable region, partial [Bos taurus]                            |
| 585 | gi 1276621   | immunoglobulin lambda light chain variable region, partial [Bos taurus]                            |
| 586 | gi 1276623   | immunoglobulin lambda light chain variable region, partial [Bos taurus]                            |
| 587 | gi 1276629   | immunoglobulin lambda light chain variable region, partial [Bos taurus]                            |

|     |              |                                                                         |
|-----|--------------|-------------------------------------------------------------------------|
| 588 | gi 950177    | immunoglobulin lambda light chain variable region, partial [Bos taurus] |
| 589 | gi 975844    | immunoglobulin lambda light chain variable region, partial [Bos taurus] |
| 590 | gi 975858    | immunoglobulin lambda light chain variable region, partial [Bos taurus] |
| 591 | gi 975860    | immunoglobulin lambda light chain variable region, partial [Bos taurus] |
| 592 | gi 741957421 | immunoglobulin lambda-like polypeptide 1 isoform X1 [Bos taurus]        |
| 593 | gi 555979456 | immunoglobulin lambda-like polypeptide 5, partial [Bos mutus]           |
| 594 | gi 2323378   | immunoglobulin light chain variable region, partial [Bos taurus]        |
| 595 | gi 2323382   | immunoglobulin light chain variable region, partial [Bos taurus]        |
| 596 | gi 2323384   | immunoglobulin light chain variable region, partial [Bos taurus]        |
| 597 | gi 2323390   | immunoglobulin light chain variable region, partial [Bos taurus]        |
| 598 | gi 2323394   | immunoglobulin light chain variable region, partial [Bos taurus]        |
| 599 | gi 2323396   | immunoglobulin light chain variable region, partial [Bos taurus]        |
| 600 | gi 2323398   | immunoglobulin light chain variable region, partial [Bos taurus]        |
| 601 | gi 2323400   | immunoglobulin light chain variable region, partial [Bos taurus]        |
| 602 | gi 2323402   | immunoglobulin light chain variable region, partial [Bos taurus]        |
| 603 | gi 2323404   | immunoglobulin light chain variable region, partial [Bos taurus]        |
| 604 | gi 2323406   | immunoglobulin light chain variable region, partial [Bos taurus]        |
| 605 | gi 2555149   | immunoglobulin light chain variable region, partial [Bos taurus]        |
| 606 | gi 2555153   | immunoglobulin light chain variable region, partial [Bos taurus]        |
| 607 | gi 3834669   | immunoglobulin light chain variable region, partial [Bos taurus]        |
| 608 | gi 3892094   | immunoglobulin light chain variable region, partial [Bos taurus]        |
| 609 | gi 3892100   | immunoglobulin light chain variable region, partial [Bos taurus]        |
| 610 | gi 3892108   | immunoglobulin light chain variable region, partial [Bos taurus]        |
| 611 | gi 92096965  | Immunoglobulin light chain, lambda gene cluster [Bos taurus]            |
| 612 | gi 310893433 | immunoglobulin light chain, partial [Bos taurus]                        |
| 613 | gi 310893435 | immunoglobulin light chain, partial [Bos taurus]                        |
| 614 | gi 310893437 | immunoglobulin light chain, partial [Bos taurus]                        |
| 615 | gi 24496448  | immunoglobulin M heavy chain secretory form [Bos taurus]                |
| 616 | gi 33413902  | immunoglobulin mu heavy chain constant region, partial [Bos taurus]     |
| 617 | gi 509264237 | immunoglobulin mu heavy chain variable region, partial [Bos taurus]     |
| 618 | gi 509264245 | immunoglobulin mu heavy chain variable region, partial [Bos taurus]     |
| 619 | gi 509264259 | immunoglobulin mu heavy chain variable region, partial [Bos taurus]     |
| 620 | gi 509264266 | immunoglobulin mu heavy chain variable region, partial [Bos taurus]     |
| 621 | gi 509264274 | immunoglobulin mu heavy chain variable region, partial [Bos taurus]     |
| 622 | gi 509264324 | immunoglobulin mu heavy chain variable region, partial [Bos taurus]     |
| 623 | gi 509264336 | immunoglobulin mu heavy chain variable region, partial [Bos taurus]     |
| 624 | gi 509264364 | immunoglobulin mu heavy chain variable region, partial [Bos taurus]     |
| 625 | gi 509264388 | immunoglobulin mu heavy chain variable region, partial [Bos taurus]     |
| 626 | gi 509264397 | immunoglobulin mu heavy chain variable region, partial [Bos taurus]     |
| 627 | gi 98991258  | immunoglobulin mu heavy chain variable region, partial [Bos taurus]     |
| 628 | gi 98991264  | immunoglobulin mu heavy chain variable region, partial [Bos taurus]     |
| 629 | gi 98991268  | immunoglobulin mu heavy chain variable region, partial [Bos taurus]     |
| 630 | gi 98991270  | immunoglobulin mu heavy chain variable region, partial [Bos taurus]     |
| 631 | gi 98991288  | immunoglobulin mu heavy chain variable region, partial [Bos taurus]     |
| 632 | gi 98991290  | immunoglobulin mu heavy chain variable region, partial [Bos taurus]     |
| 633 | gi 98991302  | immunoglobulin mu heavy chain variable region, partial [Bos taurus]     |
| 634 | gi 2353732   | immunoglobulin variable region, partial [Bos taurus]                    |

|     |            |                                                      |
|-----|------------|------------------------------------------------------|
| 635 | gi 2353734 | immunoglobulin variable region, partial [Bos taurus] |
| 636 | gi 2353736 | immunoglobulin variable region, partial [Bos taurus] |



**Supplementary table 3: Gene ontology analysis using STRING software tool that described pathway description and biological function of significant proteins.**

| Pathway ID | Pathway description                | No. of proteins | Matching proteins in the network (labels)                                                                           |
|------------|------------------------------------|-----------------|---------------------------------------------------------------------------------------------------------------------|
| GO.0008150 | Biological process                 | 21              | APOA4,ASRGL1,BPIFB1,C4A,CCT4,CFB,CFH,CLU,CNDP2,F2,F5,FGA,FGB,HPX,ITIH1,KNG1,LGALS3BP, RNASE4, RNASE6,SERPINA3,YWHAE |
| GO.0044699 | Single-organism process            | 15              | APOA4, ASRGL1,C4A,CFB,CFH,CLU,F2,F5,FETUB,FGA,FGB,HPX,KNG1,SERPINF2,YWHAE                                           |
| GO.0009987 | Cellular process                   | 15              | ASRGL1,CCT4,CLU,F2,F5,FETUB,FGA,FGB,HPX,KNG1,PSMA1,RNASE4,RNASE6,SERPINF2,YWHAE                                     |
| GO.0043170 | Macromolecule metabolic process    | 14              | APOA4,ASRGL1,C4A,CCT4,CFB,CFH,CLU,CNDP2,F2,HPX,ITIH1,PSMA1,RNASE4,RNASE6                                            |
| GO.0065007 | Biological regulation              | 14              | C4A,CFB,CFH,CLU,F2,F5,FGA,FGB,HPX,ITIH1,KNG1,PSMA1,SERPINA3,YWHAE                                                   |
| GO.0050789 | Regulation of biological process   | 13              | C4A,CFB,CFH,CLU,F2,FGA,FGB,HPX,ITIH1,KNG1,PSMA1,SERPINA3,YWHAE                                                      |
| GO.0044238 | Primary metabolic process          | 13              | APOA4,ASRGL1,C4A,CCT4,CFB,CFH,CLU,CNDP2,F2,HPX,PSMA1,RNASE4,RNASE6                                                  |
| GO.0006950 | Response to stress                 | 11              | BPIFB1,C4A,CFB,CFH,CLU,F2,F5,FGA,FGB,KNG1,SERPINF2                                                                  |
| GO.0019538 | Protein metabolic process          | 11              | APOA4,ASRGL1,C4A,CCT4,CFB,CFH,CLU,CNDP2,F2,HPX,PSMA1                                                                |
| GO.0006952 | Défense response                   | 9               | BPIFB1,C4A,CFB,CFH,F2,FGA,FGB,KNG1,SERPINF2                                                                         |
| GO.0048583 | Regulation of response to stimulus | 9               | C4A,CFB,CFH,CLU,F2,HPX,KNG1,PSMA1,SERPINF2                                                                          |
| GO.0065008 | Regulation of biological quality   | 9               | CLU,F2,F5,FGA,FGB,KNG1,NGF,SERPINF2,YWHAE                                                                           |
| GO.0032268 | Regulation of cellular protein     | 8               | CLU,F2,HPX,ITIH1,KNG1,NGF,SERPINA3,YWHAE                                                                            |

|            |                                                           |   |                                            |
|------------|-----------------------------------------------------------|---|--------------------------------------------|
|            | metabolic process                                         |   |                                            |
| GO.0048519 | Negative regulation of biological process                 | 8 | CLU,F2,ITIH1,KNG1,NGF,PSMA1,SERPINA3,YWHAE |
| GO.0048518 | Positive regulation of biological process                 | 8 | C4A,CFB,CFH,CLU,F2,HPX,NGF,SERPINF2        |
| GO.0002376 | Immune system process                                     | 7 | BPIFB1,C4A,CFB,CFH,FGA,FGB,PSMA1           |
| GO.0048584 | Positive regulation of response to stimulus               | 7 | C4A,CFB,CFH,CLU,F2,HPX,SERPINF2            |
| GO.0065009 | Regulation of molecular function                          | 7 | CLU,ITIH1,KNG1,NGF,SERPINA3,SERPINF2,YWHAE |
| GO.0048523 | Negative regulation of cellular process                   | 7 | CLU,F2,ITIH1,KNG1,NGF,SERPINA3,YWHAE       |
| GO.0045087 | Innate immune response                                    | 6 | BPIFB1,C4A,CFB,CFH,FGA,FGB                 |
| GO.0030162 | Regulation of proteolysis                                 | 6 | CLU,F2,ITIH1,KNG1,NGF,SERPINA3             |
| GO.0032269 | Negative regulation of cellular protein metabolic process | 6 | F2,ITIH1,KNG1,NGF,SERPINA3,YWHAE           |
| GO.0080134 | Regulation of response to stress                          | 6 | CLU,F2,HPX,KNG1,PSMA1,SERPINF2             |
| GO.0007596 | Blood                                                     | 5 | F2,F5,FGA,FGB,KNG1                         |

|            |                                                          |   |                                  |
|------------|----------------------------------------------------------|---|----------------------------------|
|            | coagulation                                              |   |                                  |
| GO.0042060 | Wound healing                                            | 5 | F2,F5,FGA,FGB,KNG1               |
| GO.0010951 | Negative regulation of endopeptidase activity            | 5 | ITIH1,KNG1,NGF,SERPINA3,SERPINF2 |
| GO.0045861 | Negative regulation of proteolysis                       | 5 | F2,ITIH1,KNG1,NGF,SERPINA3       |
| GO.0050776 | Regulation of immune response                            | 5 | C4A,CFB,CFH,HPX,PSMA1            |
| GO.0006508 | Proteolysis                                              | 5 | ASRGL1,CFB,CNDP2,F2,PSMA1        |
| GO.0031399 | Regulation of protein modification process               | 5 | CLU,F2,HPX,SERPINF2,YWHAE        |
| GO.0030168 | Platelet activation                                      | 4 | F2,F5,FGA,FGB                    |
| GO.1903034 | Regulation of response to wounding                       | 4 | F2,KNG1,PSMA1,SERPINF2           |
| GO.0050778 | Positive regulation of immune response                   | 4 | C4A,CFB,CFH,HPX                  |
| GO.0006954 | Inflammatory response                                    | 4 | C4A,F2,KNG1,SERPINF2             |
| GO.0032101 | Regulation of response to external stimulus              | 4 | F2,KNG1,PSMA1,SERPINF2           |
| GO.1902533 | Positive regulation of intracellular signal transduction | 4 | CLU,F2,HPX,SERPINF2              |
| GO.0031401 | Positive                                                 | 4 | CLU,F2,HPX,SERPINF2              |

|            |                                                      |   |                  |
|------------|------------------------------------------------------|---|------------------|
|            | regulation of protein modification process           |   |                  |
| GO.0006956 | Complement activation                                | 3 | C4A,CFB,CFH      |
| GO.0030193 | Regulation of blood coagulation                      | 3 | F2,KNG1,SERPINF2 |
| GO.0051258 | Protein polymerization                               | 3 | F2,FGA,FGB       |
| GO.1903035 | Negative regulation of response to wounding          | 3 | F2,KNG1,PSMA1    |
| GO.0032102 | Negative regulation of response to external stimulus | 3 | F2,KNG1,PSMA1    |
| GO.0010959 | Regulation of metal ion transport                    | 3 | F2,NGF,YWHAE     |
| GO.0006957 | Complement activation, alternative pathway           | 2 | CFB,CFH          |
| GO.0030194 | Positive regulation of blood coagulation             | 2 | F2,SERPINF2      |
| GO.0032967 | Positive regulation of collagen biosynthetic process | 2 | F2,SERPINF2      |
| GO.0006953 | Acute-phase response                                 | 2 | F2,SERPINF2      |

|            |                                          |   |          |
|------------|------------------------------------------|---|----------|
| GO.0030195 | Negative regulation of blood coagulation | 2 | F2, KNG1 |
|------------|------------------------------------------|---|----------|
